# Supplementary material
Source: publisher site journal article supplement (https://www.kjim.org/upload/media/kjim-2023-276-Supplementary-Table-1.pdf)
Supplement: Supplementary file 1 [file kjim-2023-276-Supplementary-Table-1.pdf]

**Supplementary Table 1. Measured items for latent variables employed in the SEM**

| Latent variable                            | Observed variable                                                                                                                                                                                                                                                 | No. of items |
|--------------------------------------------|-------------------------------------------------------------------------------------------------------------------------------------------------------------------------------------------------------------------------------------------------------------------|--------------|
| Socioeconomic status                       | Income, education, insurance, marital status                                                                                                                                                                                                                      | 4            |
| Comorbidity                                | Age-adjusted Charlson comorbidity index, heart failure, hypertension, angina or myocardial infarction, stroke, interstitial lung disease, pneumonia, tuberculosis, asthma, hepatitis, peptic ulcer, diabetes, malignancy, depression, bone fracture, osteoporosis | 16           |
| Lifestyle habit and healthcare utilization | Alcohol, smoking, exercise, hospitalization, check-up, medication compliance, alternative medicine (glucosamine, chondroitin, omega-3, vitamin D, calcium, iron, ginseng)                                                                                         | 13           |

SEM, structured equation modeling.
